# Supplementary material
Source: PubMed Central journal article supplement (PMC4711132)
Supplement: AEM.02980-15_zam999116861so1.pdf [file AEM.02980-15_zam999116861so1.pdf]

1 **SUPPLEMENTAL MATERIAL**

2

3 **Table S1.** Multiplex identifier (MID) sequence barcodes corresponding to samples in this  
4 study, submitted to the NCBI Sequence Read Archive under the accession number  
5 SRP065064.

| <b>MID Sequence</b> | <b>Sample</b> | <b>Source</b>       |
|---------------------|---------------|---------------------|
| GAGTACTC            | I1            | Sponge (intertidal) |
| GAGTAGAC            | I2            | Sponge (intertidal) |
| GAGTAGTG            | I3            | Sponge (intertidal) |
| GAGTCACT            | I4            | Sponge (intertidal) |
| GAGTCAGA            | I5            | Sponge (intertidal) |
| GAGTCTCA            | I6            | Sponge (intertidal) |
| GAGAGTGT            | S1            | Sponge (subtidal)   |
| GAGATCAG            | S2            | Sponge (subtidal)   |
| GAGATCTC            | S3            | Sponge (subtidal)   |
| GAGATGAC            | S4            | Sponge (subtidal)   |
| GAGATGTG            | S5            | Sponge (subtidal)   |
| GAGTACAG            | S6            | Sponge (subtidal)   |
| GAGTGTCT            | T1            | Sediment            |
| GAGTGTGA            | T2            | Sediment            |
| GAGTTCAC            | T3            | Sediment            |
| GAGTCTGT            | W1            | Seawater            |
| GAGTGACA            | W2            | Seawater            |
| GAGTGAGT            | W3            | Seawater            |

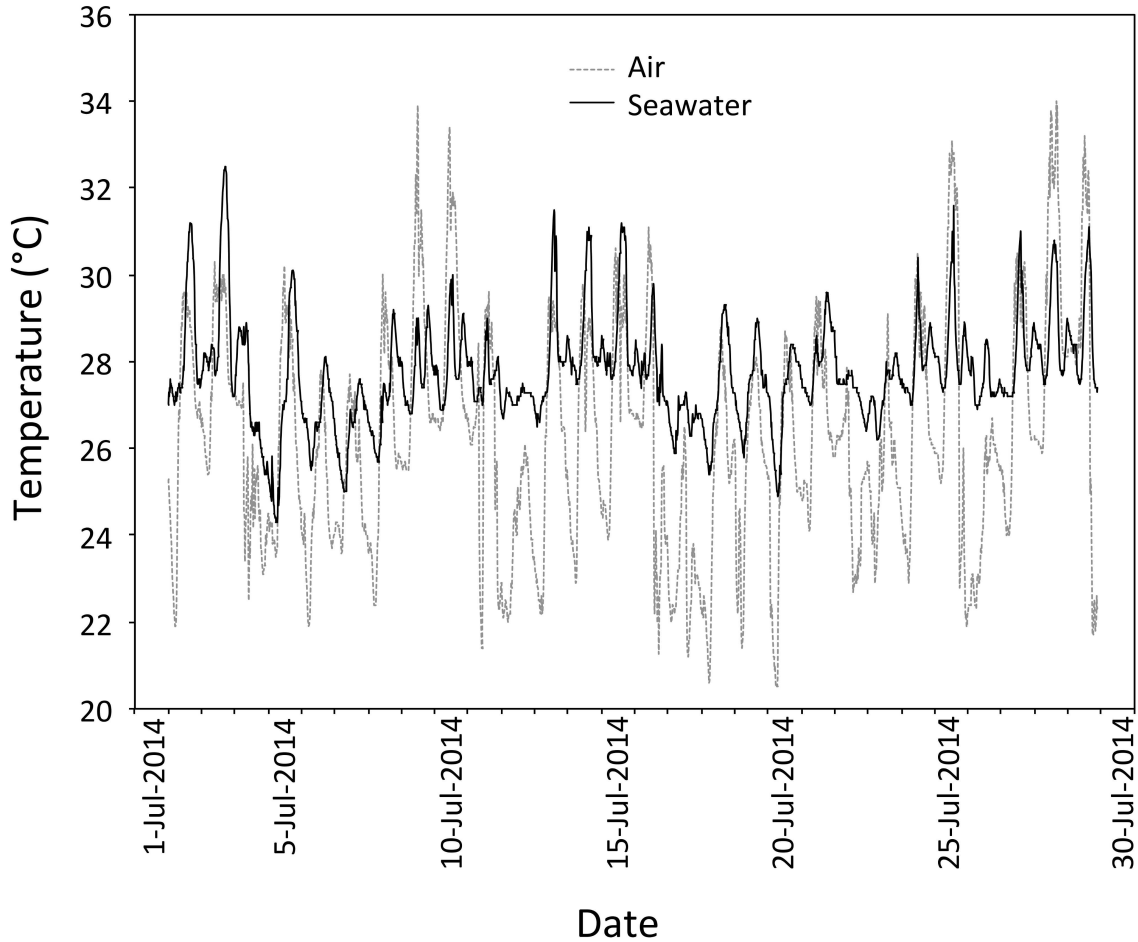

8

9

10 **Figure S1.** Air (*gray dotted line*) and seawater (*black solid line*) temperatures during the  
 11 collection month (July 2014) recorded at 15 min intervals by monitoring stations at  
 12 Research Creek (34.1555 N, -77.8509 W) and Loosin Creek (34.1722 N, -77.8328 W),  
 13 respectively. Intertidal sponges are exposed periodically to the more variable and extreme  
 14 air temperatures, while subtidal sponges occupy the more stable thermal regime of  
 15 seawater.

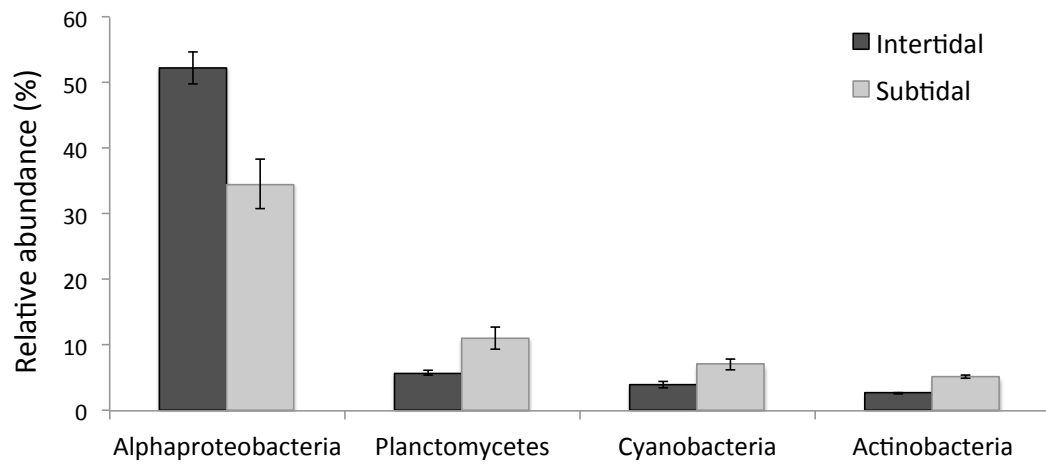

16

17 **Figure S2.** Symbiont taxa exhibiting significant differences (t-test,  $P < 0.05$ ) in relative

18 abundance between intertidal (*dark grey*) and subtidal (*light grey*) sponge hosts.

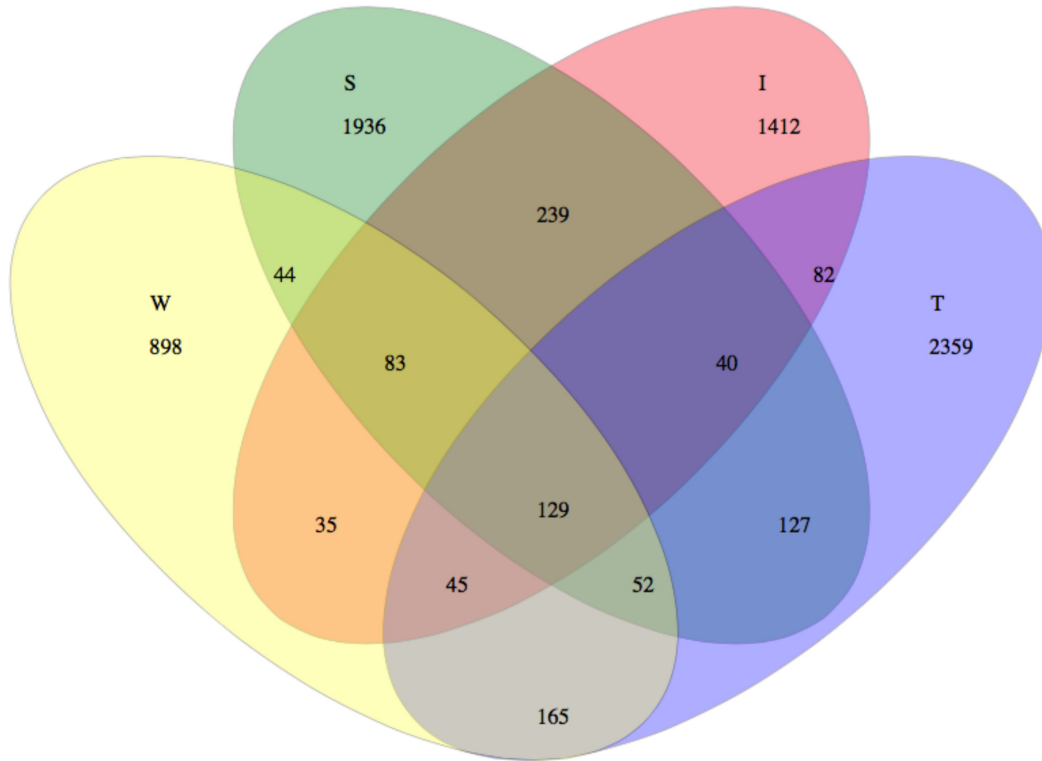

19

20 **Figure S3.** Venn diagram comparing the overlap in 97% microbial OTU richness among  
 21 subtidal *H. heliophila* (S, green), intertidal *H. heliophila* (I, red), seawater (W, yellow),  
 22 and sediment (T, blue). Total OTU species richness is 7,646 from all four environments.
